# Supplementary material for: Expansion of Host Regulatory T Cells by Secreted Products of the Tapeworm Echinococcus multilocularis
Source: PubMed Central journal article supplement (PMC7225322; doi:10.3389/fimmu.2020.00798), 2020-05-08

**A**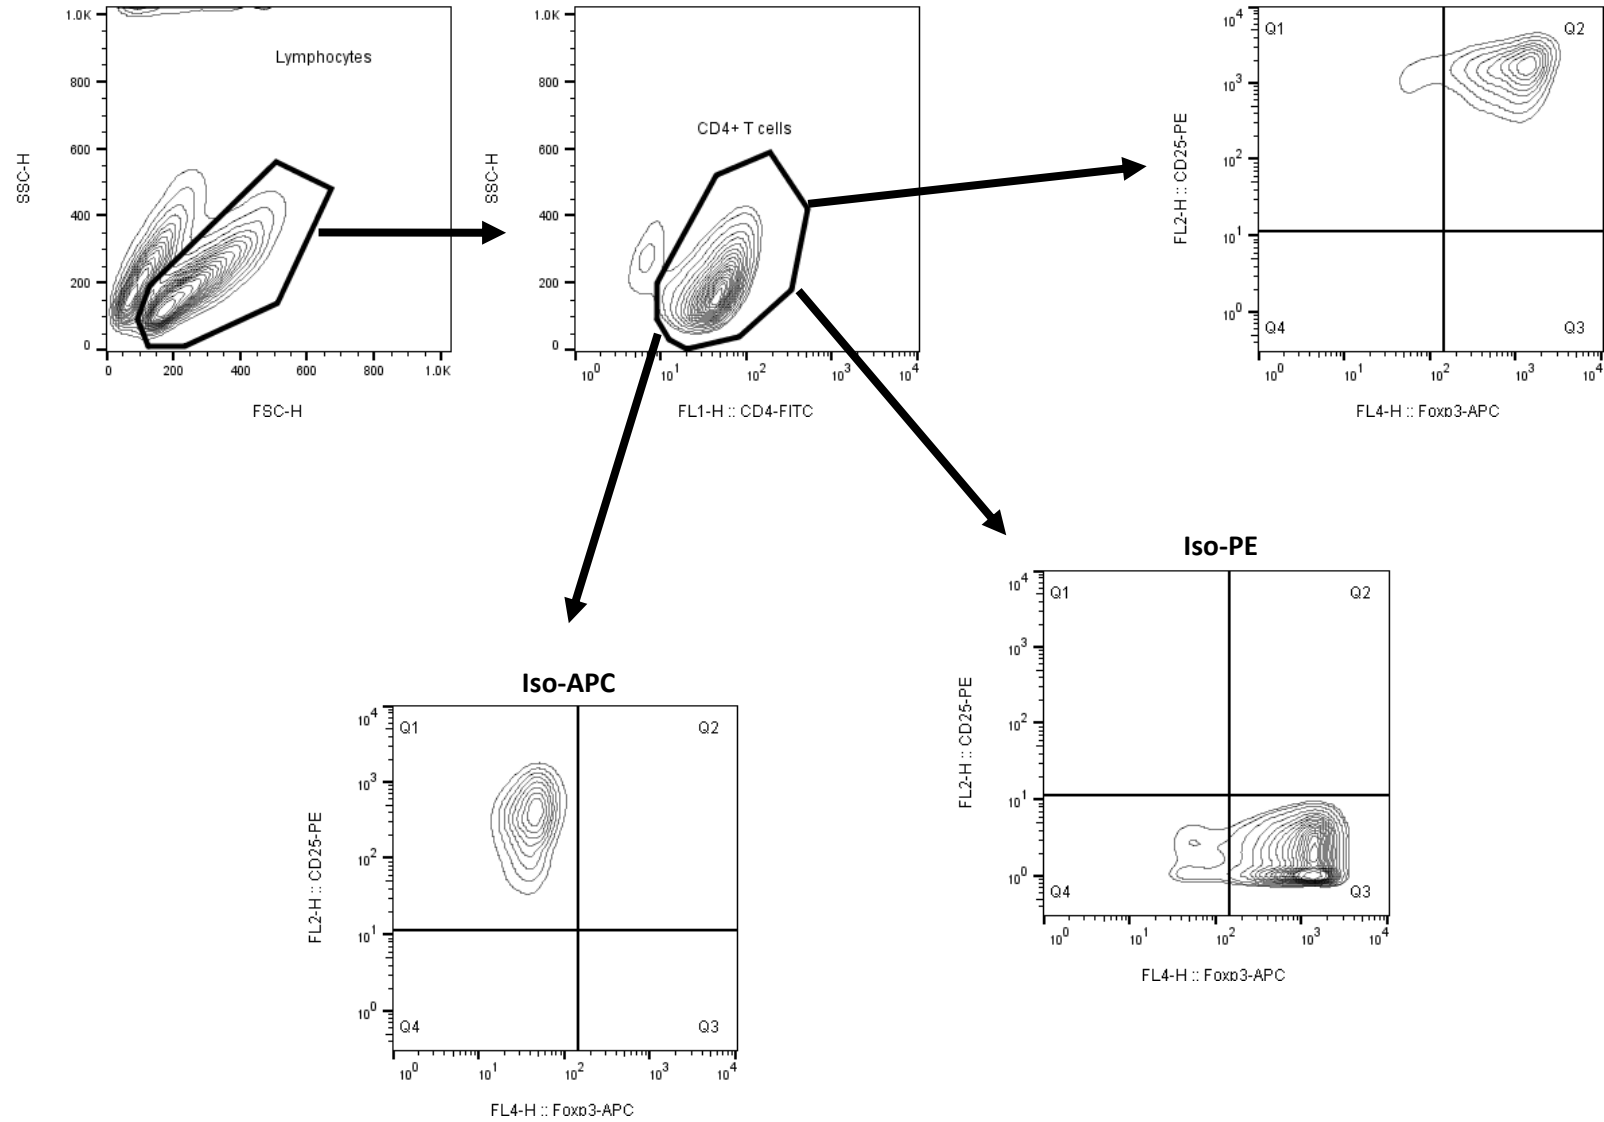**B**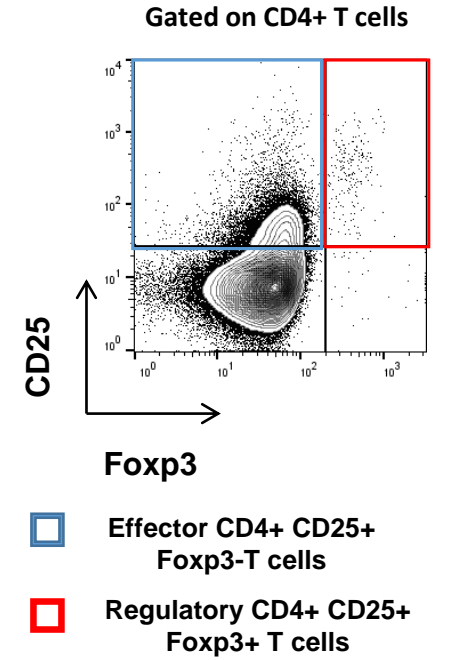

Supplement: Image_2.pdf [file Image_2.pdf]
