# Supplementary material for: Expansion of Host Regulatory T Cells by Secreted Products of the Tapeworm Echinococcus multilocularis
Source: PubMed Central journal article supplement (PMC7225322; doi:10.3389/fimmu.2020.00798), 2020-05-08

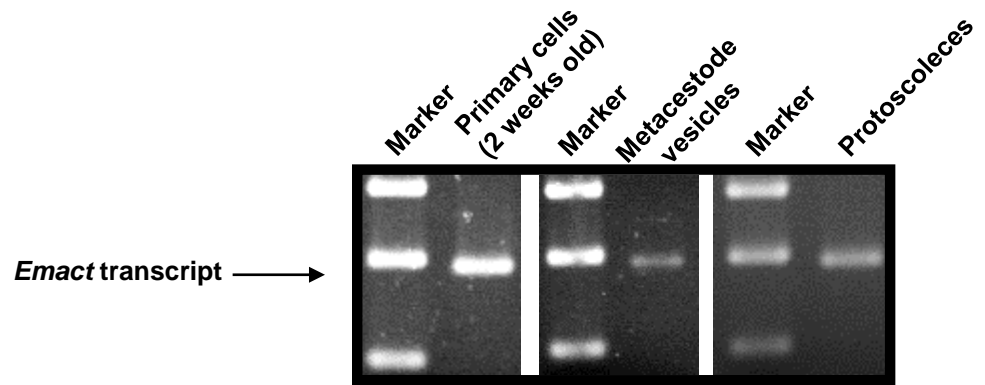

Supplement: Image_3.pdf [file Image_3.pdf]
