# Supplementary material for: Expansion of Host Regulatory T Cells by Secreted Products of the Tapeworm Echinococcus multilocularis
Source: PubMed Central journal article supplement (PMC7225322; doi:10.3389/fimmu.2020.00798), 2020-05-08
Supplement: Image_4.pdf [file Image_4.pdf]

**Insert Myc sequence by site-directed mutagenesis**

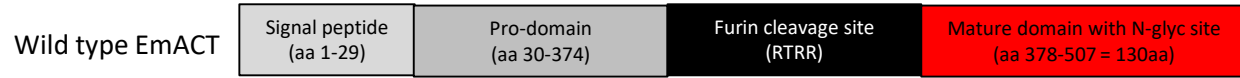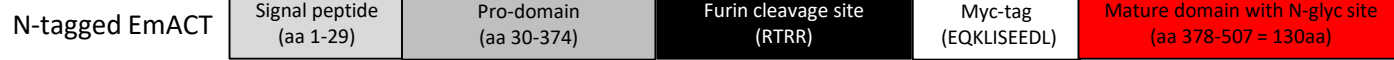

**Processing**

**Processing**

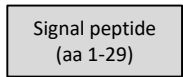

**SP**

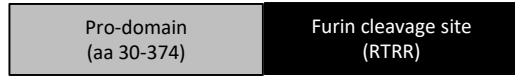

**Pro-domain**

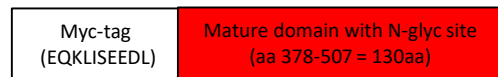

**Secreted N-term tagged mature EmACT**

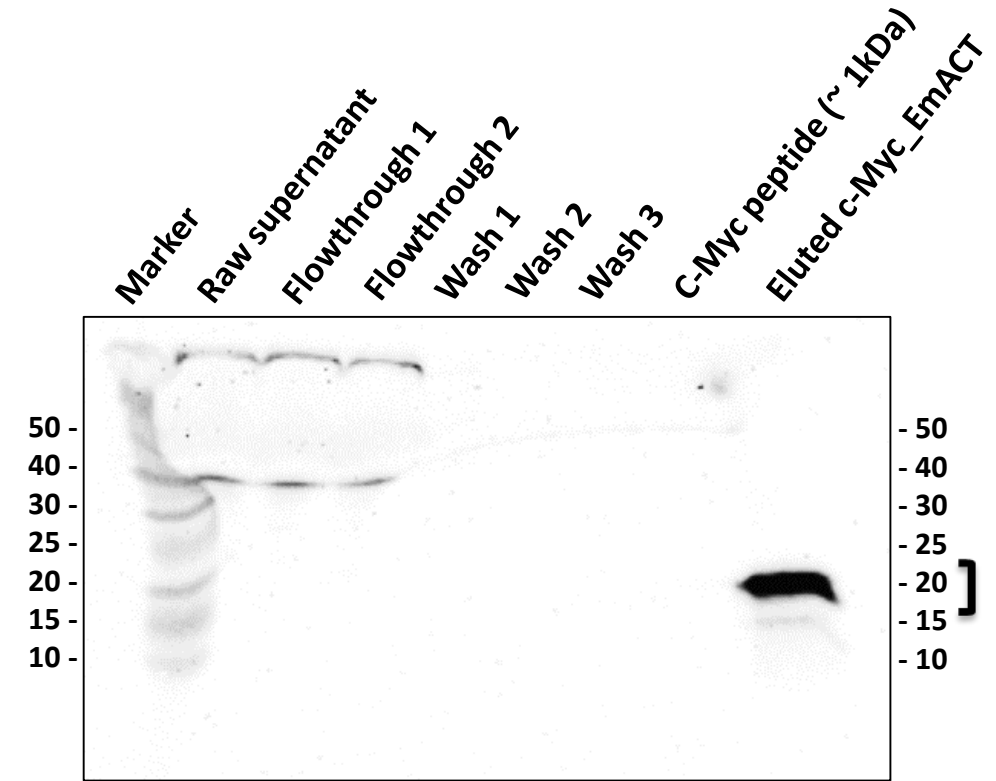

**Detection with anti-c-Myc after 60 secondes**
